# Supplementary material for: Shifting paradigms for Nepal’s protected areas: history, challenges and relationships
Source: Springer Nature journal article supplement (doi:10.1007/s11629-016-3980-9), 2017-05-01
Supplement: 11629_2016_3980_MOESM1_ESM.pdf [file 11629_2016_3980_MOESM1_ESM.pdf]

The following appendixes (Appendixes 1-5) are the Electronic Supplementary Material of the article entitled “Shifting paradigms for Nepal’s protected areas: history, challenges and relationships” at <http://dx.doi.org/10.1007/s11629-016-3980-9>

**Appendix 1** Protected areas of Nepal: Establishment history, elevational location and categories

| Protected Areas (PAs)            | Area (km <sup>2</sup> ) | Gazetted in (year) | IUCN category | Elevational location       |
|----------------------------------|-------------------------|--------------------|---------------|----------------------------|
| Chitwan National Park            | 932                     | 1973               | II            | Lowlands                   |
| Bardia National Park             | 968                     | 1976               | II            | Lowlands                   |
| Sagarmatha National Park         | 1148                    | 1976               | II            | High mountains             |
| Langtang National Park           | 1720                    | 1976               | II            | Midhill and high mountains |
| Rara National Park               | 106                     | 1976               | II            | Midhill                    |
| Koshitappu Wildlife Reserve      | 175                     | 1976               | IV            | Lowlands                   |
| Shuklaphanta Wildlife Reserve    | 305                     | 1976               | IV            | Lowlands                   |
| Shey-phoksundo National Park     | 3555                    | 1984               | II            | High mountains             |
| Khaptad National Park            | 225                     | 1984               | II            | Midhill                    |
| Parsa Wildlife Reserve           | 499                     | 1984               | IV            | Lowlands                   |
| Dhorpatan Hunting Reserve        | 325                     | 1987               | VI            | High mountains             |
| Makalu Barun National Park       | 1500                    | 1991               | II            | Midhill and high mountains |
| Annapurna Conservation Area      | 7629                    | 1992               | VI            | Midhill and high mountains |
| Kanchenjunga Conservation Area   | 2035                    | 1997               | VI            | High mountains             |
| Manaslu Conservation Area        | 1663                    | 1998               | VI            | High mountains             |
| Shivapuri-Nagarjun National Park | 159                     | 2002               | II            | Midhill                    |
| Blackbuck Conservation Area      | 17                      | 2009               | VI            | Lowlands                   |
| Banke National Park              | 550                     | 2010               | II            | Lowlands                   |
| Gaurishankar Conservation Area   | 2179                    | 2010               | VI            | Midhill and high mountains |
| Apinampa Conservation Area       | 1903                    | 2010               | VI            | High mountains             |

Source: [DNPWC 2011a](#)

**Appendix 2** Major legislative changes in protected area (PA) management and development in Nepal

| Year | Legislation                                                | Legislative changes                                             | PA management approach                  | Conservation output                                     | Effect                                                                 |
|------|------------------------------------------------------------|-----------------------------------------------------------------|-----------------------------------------|---------------------------------------------------------|------------------------------------------------------------------------|
| 1973 | National Parks and Wildlife Conservation Act (NPWCA), 1973 | Park declaration and ban on resource use                        | Fine and fence-Pristine nature          | Improved ecosystems/depleted wildlife numbers increased | Livelihood deterioration, Human-wildlife conflict (HWC) <sup>1,2</sup> |
| 1976 | Highland National Parks Regulation, 1976                   | Grazing, firewood and timber collection allowed in highland PAs | Participation of locals in conservation | Sustainable use of natural resources                    | Support of local people in conservation <sup>2</sup>                   |
| 1979 | 1 <sup>st</sup> amendment of NPWCA, 1973                   | Thatch and reed collection permitted in lowland PAs             | Participation of locals in conservation | Restored ecosystems                                     | Support in livelihood, HWC continue to increase <sup>3</sup>           |
| 1989 | 3 <sup>rd</sup> amendment of NPWCA, 1973                   | Peoples' involvement in planning PAs' activities                | Integrated conservation and development | Sustainable use of natural resources                    | Ownership feeling among local people <sup>4</sup>                      |
| 1993 | 4 <sup>th</sup> amendment of NPWCA, 1973                   | PAs' revenue sharing                                            | People-centred approach                 | Local development and conflict mitigation               | Positive attitude of locals to PAs <sup>5</sup>                        |
| 1996 | Buffer Zone Management Regulation, 1996                    | Forest managed by local community                               | People-centred approach                 | Extended habitat in buffer zone forest                  | Forest resources needs of locals fulfilled <sup>5</sup>                |
| 2003 | PA management working procedure                            | NGO/CBO managed PA                                              | Integrated conservation and development | Sustainable use of natural resources                    | Effective management <sup>6</sup>                                      |

1 Seeland 2000; 2 Kollmair et al. 2003; 3 Sharma 1990; 4 Heinin & Mehta 1999; 5 Paudel et al. 2007; 6 DNPWC 2011b

**Appendix 3** Major challenges in protected area management in Nepal throughout different decades

|                            | Major Challenges                                       | 1970s  | 1980s  | 1990s  | 2000s  | 2010s  |
|----------------------------|--------------------------------------------------------|--------|--------|--------|--------|--------|
| Conflicts                  | Land use conflict                                      | High   | High   | Medium | Low    | High   |
|                            | Conflict with local community                          | High   | High   | Medium | Medium | Low    |
|                            | Human wildlife conflict                                | Low    | Medium | High   | High   | Medium |
| Over Exploitation          | Poaching of wildlife and smuggling of herbs and timber | Low    | Medium | High   | High   | Medium |
|                            | Exploitation of minerals                               | Low    | Low    | Medium | High   | High   |
| Management of Disturbances | Illegal grazing                                        | High   | High   | Medium | Low    | Low    |
|                            | Invasive species                                       | Low    | Low    | Medium | Medium | High   |
|                            | Fire                                                   | Low    | Low    | Medium | Medium | High   |
| Tourism and Development    | Development pressure                                   | Low    | Low    | Medium | High   | High   |
|                            | Tourism pressure and garbage management                | Low    | Low    | Medium | Medium | High   |
| Resourcing                 | Lack of human resources                                | Low    | Low    | Medium | High   | Low    |
|                            | Outdated policies                                      | High   | High   | Medium | Medium | Medium |
|                            | Lack of sustainable funding                            | Medium | Low    | Medium | High   | High   |

**Appendix 4** Organizational structure of National Wildlife Crime Control Coordination Committee

| Organizational structure                               | Role             |
|--------------------------------------------------------|------------------|
| Minster of Forests and Soil Conservation               | Chair            |
| Secretary of Ministry of Home Affairs                  | Member           |
| Secretary of Ministry of Defense                       | Member           |
| Secretary of Ministry of Finance                       | Member           |
| Secretary of Ministry of Law and Justice               | Member           |
| Secretary of Ministry of Forests and Soil Conservation | Member           |
| Chief, Nepal Army                                      | Member           |
| Chief, Nepal Police                                    | Member           |
| Chief, Armed Police Force                              | Member           |
| Chief, Central Investigation Bureau                    | Member           |
| Director General, DNPWC                                | Member Secretary |

Source: [Acharya and Kandel 2012](#)

**Appendix 5** A list of major achievements in protected area management in Nepal

- Biodiversity conservation of the country improved nationwide biodiversity conservation outcomes
- Improvement and enrichment of habitats
- Restoration of depleted wildlife populations
- Increased tolerance to human-wildlife conflict and prevention and mitigation of human-wildlife conflict
- Improvements in relationships between parks and local people living in communities adjacent to protected areas
- Institutionalized community-buffer zone user groups
- Increased participation of local people in conservation, largely through community forest management in buffer zone and conservation areas
- Community based anti- poaching groups and reduced level of poaching of major wildlife species-zero poaching years for rhino
- Sensitized local community-aware about nature conservation through conservation education Increased awareness of nature conservation among local people living in communities adjacent to protected areas
- Sustainable development programs in communities adjacent to protected areas to improve living conditions and reduce reliance on park resources (eg. Improved access to drinking water, improvement of roads improvement, maintenance of schools and bridges, establishment of health centres, introduction of hydro- and solar-powered electrification)
- Sustainable development programs in communities adjacent to protected areas to provide alternative livelihoods and reduce hunting (e.g. Skills development training including basic household electrical maintenance, maintenance of solar power systems, improved agriculture, tailoring)
- Improved international collaboration and regional cooperation (eg. Transboundary meetings between Nepal/India and Nepal/China, establishment of South Asia Wildlife Enforcement Network (SAWEN), Wildlife Crime Control Coordination Committees at central and local levels
